# Supplementary material
Source: MDPI journal article supplement (https://www.mdpi.com/2227-7102/14/5/487)
Supplement: s1 [file s1]

## Supplement

Supplemental Table S1.

Differences between racially marginalized and non-racially marginalized students' perceptions of cost at the chapter level for the original textbook (Version 4.0)

|            | Non-racially<br>marginalized |           | Racially<br>marginalized |           |           |          |          |                  |
|------------|------------------------------|-----------|--------------------------|-----------|-----------|----------|----------|------------------|
|            | <i>M</i>                     | <i>SD</i> | <i>M</i>                 | <i>SD</i> | <i>df</i> | <i>t</i> | <i>p</i> | Cohen's <i>d</i> |
| Chapter 2  | 2.60                         | 1.08      | 2.91                     | 1.04      | 212       | -2.08    | .039     | 1.065            |
| Chapter 3  | 2.85                         | 1.142     | 3.22                     | 1.17      | 211       | -2.30    | .023     | 1.154            |
| Chapter 4  | 3.05                         | 1.107     | 3.44                     | 1.05      | 209       | -2.53    | .012     | 1.085            |
| Chapter 5  | 2.95                         | 1.13      | 3.28                     | 1.22      | 211       | -1.99    | .048     | 1.165            |
| Chapter 6  | 3.05                         | 1.213     | 3.38                     | 1.15      | 207       | -1.90    | .059     | 1.189            |
| Chapter 7  | 3.10                         | 1.195     | 3.44                     | 1.24      | 207       | -1.94    | .054     | 1.214            |
| Chapter 8  | 3.26                         | 1.247     | 3.73                     | 1.29      | 209       | -2.64    | .009     | 1.262            |
| Chapter 9  | 3.01                         | 1.232     | 3.38                     | 1.23      | 207       | -2.09    | .038     | 1.230            |
| Chapter 10 | 3.08                         | 1.211     | 3.51                     | 1.30      | 207       | -2.37    | .019     | 1.246            |
| Chapter 11 | 2.98                         | 1.278     | 3.48                     | 1.21      | 205       | -2.73    | .007     | 1.255            |
| Chapter 12 | 2.95                         | 1.252     | 3.28                     | 1.21      | 204       | -1.82    | .071     | 1.238            |

Supplemental Table S2.

Differences between racially marginalized and non-racially marginalized students' perceptions of cost at the chapter level for the redesigned textbook (Version 5.0)

|            | Non-racially<br>marginalized |           | Racially<br>marginalized |           |           |          |          |                  |
|------------|------------------------------|-----------|--------------------------|-----------|-----------|----------|----------|------------------|
|            | <i>M</i>                     | <i>SD</i> | <i>M</i>                 | <i>SD</i> | <i>df</i> | <i>t</i> | <i>p</i> | Cohen's <i>d</i> |
| Chapter 2  | 2.35                         | 1.09      | 2.68                     | 1.33      | 207       | -1.79    | .038     | 1.173            |
| Chapter 3  | 2.70                         | 1.18      | 2.75                     | 1.30      | 201       | -0.26    | .396     | 1.216            |
| Chapter 4  | 2.66                         | 1.05      | 3.03                     | 1.33      | 203       | -1.98    | .025     | 1.150            |
| Chapter 5  | 2.85                         | 1.21      | 3.01                     | 1.41      | 203       | -0.88    | .191     | 1.280            |
| Chapter 6  | 2.80                         | 1.22      | 2.90                     | 1.38      | 202       | -0.53    | .300     | 1.275            |
| Chapter 7  | 2.82                         | 1.22      | 3.06                     | 1.29      | 203       | -1.31    | .096     | 1.244            |
| Chapter 8  | 2.84                         | 1.29      | 2.96                     | 1.12      | 199       | -0.63    | .264     | 1.263            |
| Chapter 9  | 2.92                         | 1.26      | 2.97                     | 1.30      | 199       | -0.27    | .395     | 1.272            |
| Chapter 10 | 2.72                         | 1.30      | 3.03                     | 1.50      | 204       | -1.55    | .061     | 1.368            |
| Chapter 11 | 2.75                         | 1.32      | 2.88                     | 1.30      | 196       | -0.63    | .264     | 1.309            |
| Chapter 12 | 2.86                         | 1.39      | 2.91                     | 1.39      | 198       | -0.24    | .404     | 1.389            |
